# Supplementary material for: Neighbourhood socioeconomic status and overweight/obesity: a systematic review and meta-analysis of epidemiological studies
Source: PubMed Central journal article supplement — BMJ Open. 2019 Nov 14;9(11):e028238. doi: 10.1136/bmjopen-2018-028238 (PMC6886990; doi:10.1136/bmjopen-2018-028238), 2019-11-14
Supplement: bmjopen-2018-028238supp001.pdf [file bmjopen-2018-028238supp001.pdf]

## PubMed Search strategy

| Search | Query                                                                                                                                                                                                                                                                                                                                                                                                                                                                                                                                                                                                                                                                                                | Hits*   |
|--------|------------------------------------------------------------------------------------------------------------------------------------------------------------------------------------------------------------------------------------------------------------------------------------------------------------------------------------------------------------------------------------------------------------------------------------------------------------------------------------------------------------------------------------------------------------------------------------------------------------------------------------------------------------------------------------------------------|---------|
| #1     | (((((Body Weight[MeSH Terms]) OR Body Mass Index[MeSH Terms]) OR Body weight[Title/Abstract]) OR Weight[Title/Abstract]) OR Obesity[Title/Abstract]) OR Overweight[Title/Abstract]) OR Overweight[Title/Abstract]) OR BMI[Title/Abstract]                                                                                                                                                                                                                                                                                                                                                                                                                                                            | 1049827 |
| #2     | ((((((((((Residence Characteristics/statistics and numerical data[MeSH Terms]))) OR Residence Characteristics/standards[MeSH Terms]) OR Residence Characteristics/economics[MeSH Terms]) OR Poverty Areas[MeSH Terms]) OR neighborhood socioeconomic*[Title/Abstract]) OR neighbourhood socioeconomic*[Title/Abstract]) OR neighborhood-level socioeconomic*[Title/Abstract]) OR neighbourhood-level socioeconomic*[Title/Abstract]) OR neighborhood socioeconomic*[Title/Abstract]) OR neighbourhood socioeconomic*[Title/Abstract]) OR neighborhood-level socioeconomic*[Title/Abstract]) OR neighbourhood-level socioeconomic*[Title/Abstract]) OR index of multiple deprivation*[Title/Abstract] | 15170   |
| #3     | #1 AND #2                                                                                                                                                                                                                                                                                                                                                                                                                                                                                                                                                                                                                                                                                            | 4,005   |

\*= Date of search: September 25, 2019
